# Supplementary material
Source: publisher figshare collection journal article supplement (https://gsajournals.figshare.com/ndownloader/files/15368201)
Supplement: Supplementary file 1 [file 15368201]

## Sheet: Sheet1
Table S4. qPCR primers
Gene	Forward sequence (5’ to 3’)	Reverse sequence (5’ to 3’)
rpl13a	TCTGGAGGACTGTGTAAGAGGTATGC	AGACGCACAATCTTGAGAGCAG
fgfr1a	GTGGGCTTCTTCCTCATCTGTGTG	GGGAAGCTCGTATTCGGAGACC
fgfr1b	GACGTAGTGGAGCGATCACC	GGCCAGCAGTCTTTAGTACGC
fgfr2	AGGTGTGTTTCTGATCGCCTG	CCTCAGGGAGGTCGTATTCTGG
fgfr3	CGTCAATGTTCTTAAGACTGCTGGG	CTCCACCGCTGGTAAGACTG
fgfr4	GTGAAGATTGTGAAGACAGGAAGC	GGCTACATCCTCCTCTGATAAGAC
